# Supplementary material
Source: PubMed Central journal article supplement (PMC6233793)
Supplement: jama-320-1455-s004.pdf [file jama-320-1455-s004.pdf]

## Data Sharing Statement

Dellinger. Effect of Targeted Polymyxin B Hemoperfusion on 28-Day Mortality in Patients With Septic Shock and Elevated Endotoxin Level. *JAMA*. Published October 09, 2018. 10.1001/jama.2018.14618

### Data

**Data available:** No

### Additional Information

**Explanation for why data not available:** Data sharing will not occur beyond the requests from investigators of the trial.
